# Supplementary material for: Zwint-1 is a novel Aurora B substrate required for the assembly of a dynein-binding platform on kinetochores
Source: PubMed Central journal article supplement — Mol Biol Cell. 2011 Sep 15;22(18):3318–30. doi: 10.1091/mbc.E11-03-0213 (PMC3172258; doi:10.1091/mbc.e11-03-0213), 2011-09-15
Supplement: supp_E11-03-0213_CombinedSupMats.pdf [file supp_E11-03-0213_CombinedSupMats.pdf]

Supplemental Figure 2 A&B.

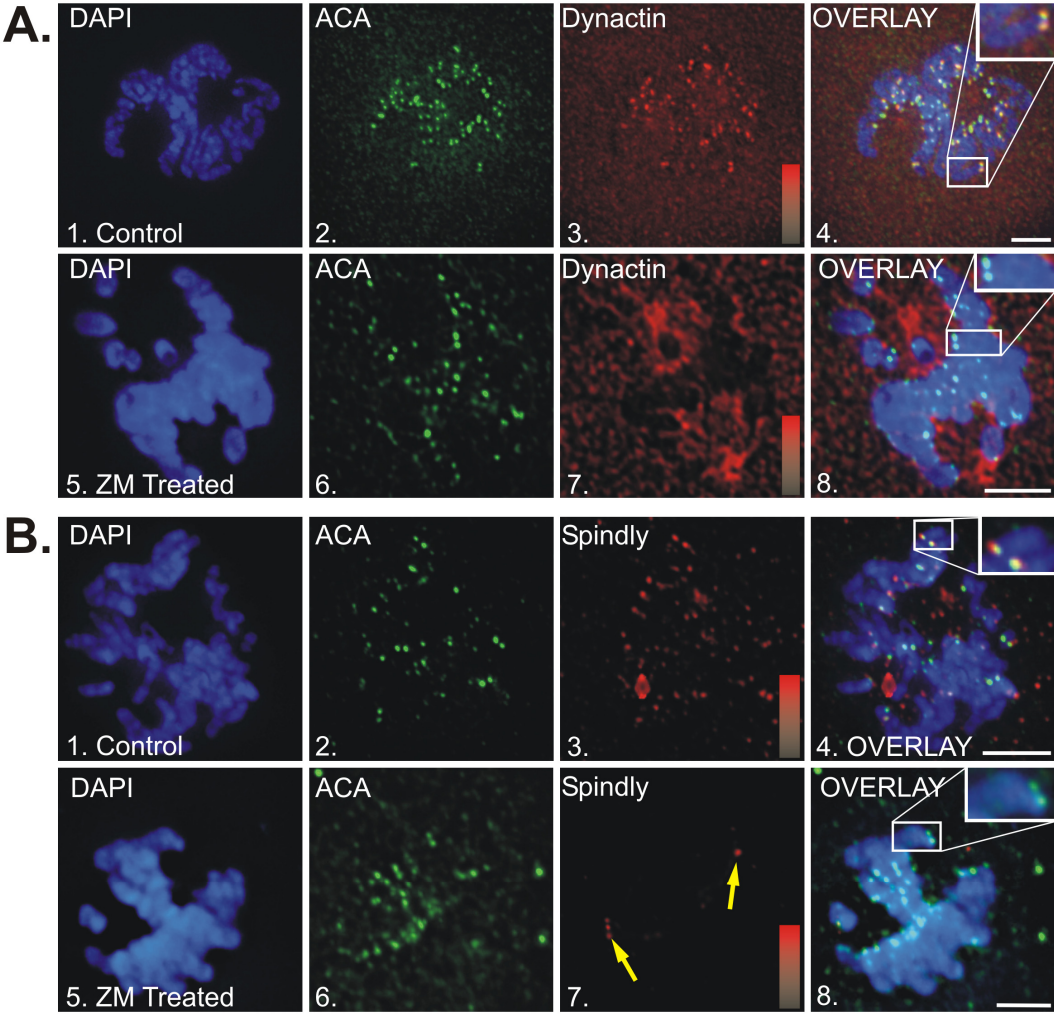

Supplemental Figure 2 C&D.

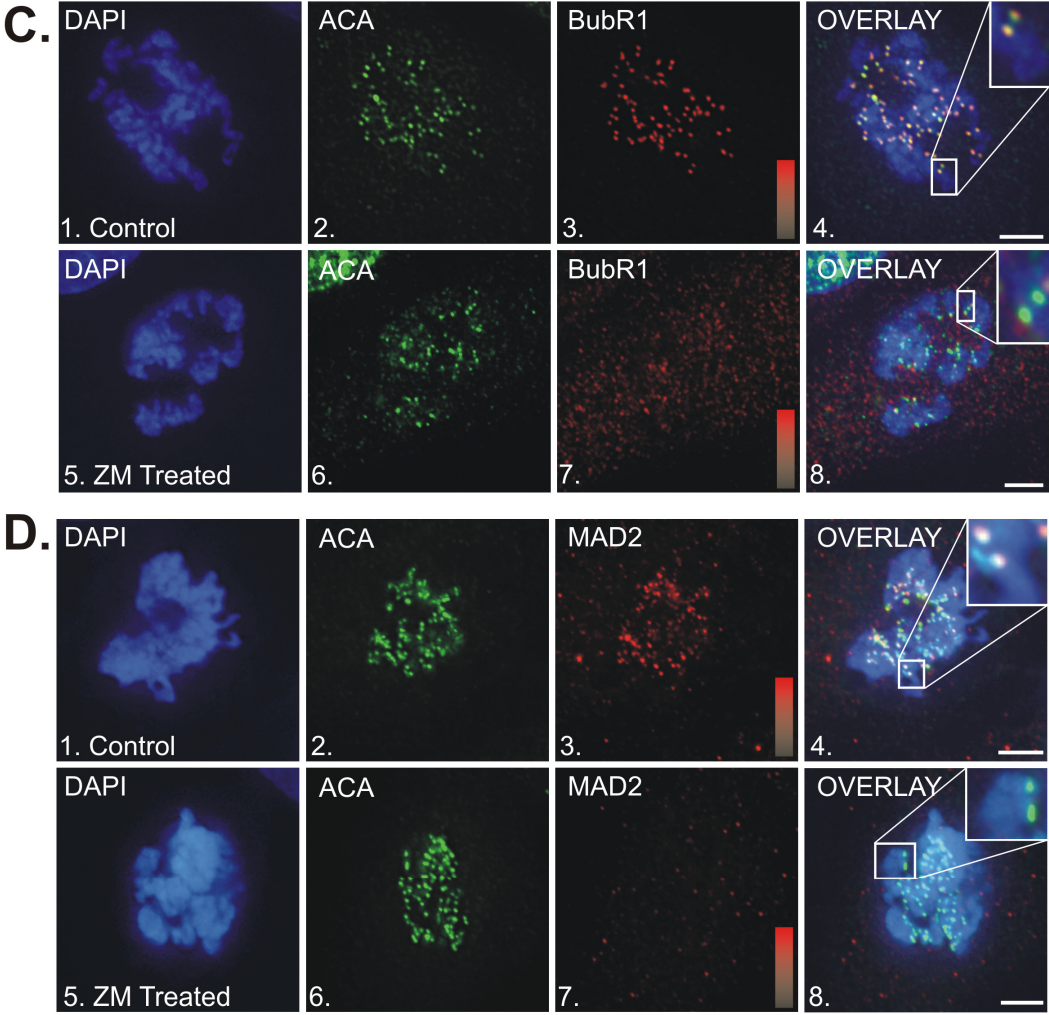

## Supplemental Figure 2E&F.

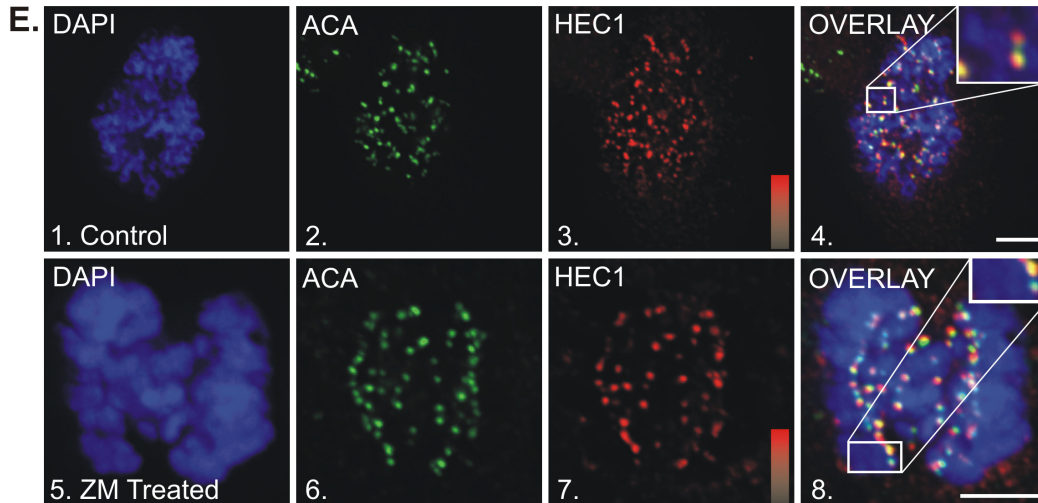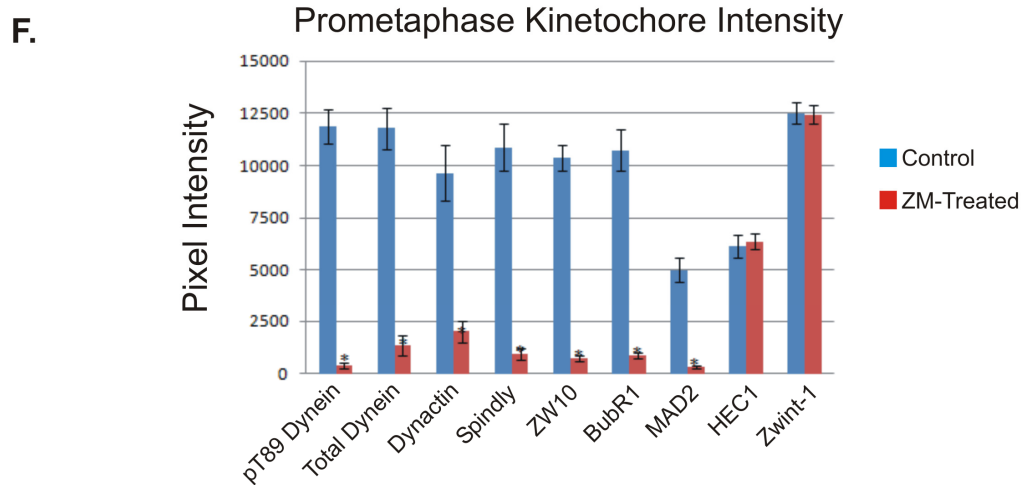

**Supplemental Figure 2: Impact of Aurora B Inhibition of Recruitment of Dynein-associated Proteins to Kinetochores. A)** NRK2 cells stained for chromatin (DAPI-blue), ACA (green), and dynactin (red-p150<sup>Glued</sup>) in controls (panels 1-4) and ZM-treated cells (panels 5-8). Overlay panels reveal colocalization of dynactin with ACA in controls but not ZM-treated cells (insets). Intensity gradients represent a range of 0–12,000 for dynactin staining. Average pixel intensity was 9641 +/- 1333 for controls and 2000 +/- 486 for ZM-treated cells ( $p < 0.0001$ ). Mag. bar = 5 $\mu$ m. **B)** NRK2 cells stained for chromatin (DAPI-blue), ACA (green), and spindly (red) in controls (panels 1-4) and ZM-treated cells (panels 5-8). Overlay panels reveal colocalization of spindly with ACA in controls but not ZM-treated cells (insets). A population of spindly remains at the spindle poles (arrows) after ZM-treatment (panel 7). Intensity gradients represent a range of 0–

13,000 for spindly staining. Average pixel intensity was 10880 +/- 1107 for controls and 910 +/- 278 for ZM-treated cells ( $p < 0.0001$ ). Mag. bar = 5 $\mu$ m. **C)** NRK2 cells stained for chromatin (DAPI-blue), ACA (green), and BubR1 (red) in controls (panels 1-4) and ZM-treated cells (panels 5-8). Overlay panels reveal colocalization of BubR1 with ACA in controls but not ZM-treated cells (insets). Intensity gradients represent a range of 0–12,500 for BubR1 staining. Average pixel intensity was 10750 +/- 973 for controls and 900 +/- 141 for ZM-treated cells ( $p < 0.0001$ ). Mag. bar = 5 $\mu$ m. **D)** HeLa cells stained for chromatin (DAPI-blue), ACA (green), and MAD2 (red) in controls (panels 1-4) and ZM-treated cells (panels 5-8). Overlay panels reveal colocalization of Mad2 with ACA in controls but not ZM-treated cells (insets). Intensity gradients represent a range of 0–5,500 for Mad2 staining. Average pixel intensity was 5001 +/- 600 for controls and 327 +/- 70 for ZM-treated cells ( $p < 0.0001$ ). Mag. bar = 5 $\mu$ m. **E)** HeLa cells stained for chromatin (DAPI-blue), ACA (green), and HEC1 (red) in controls (panels 1-4) and ZM-treated cells (panels 5-8). Overlay panels reveal colocalization of HEC1 with ACA in both controls and ZM-treated cells (insets). Intensity gradients represent a range of 0–6,600 for HEC1 staining. Average pixel intensity was 6138 +/- 536 for controls and 6367 +/- 361 for ZM-treated cells ( $p = 0.2534$ ). Mag. bar = 5 $\mu$ m. **F)** Statistical Analysis of Kinetochore Protein Accumulation After AurB Inhibition. Proteins analyzed during prometaphase as part of this study are compared in control and ZM-treated cells. Asterisks indicate statistically-significant differences.

## Supplemental Figure 3.

**A.**

| M     | Y    | SEQ | B    | M     |
|-------|------|-----|------|-------|
| 129   | 129  | Q   | 2369 | 128.1 |
| 167   | 296  | S   | 2241 | 167   |
| 181   | 477  | T   | 2060 | 181   |
| 57    | 534  | G   | 1896 | 57    |
| 115   | 649  | D   | 1839 | 115   |
| 101   | 750  | T   | 1724 | 101   |
| 131   | 881  | M   | 1623 | 131   |
| 57    | 938  | G   | 1492 | 57    |
| 156.1 | 1094 | R   | 1435 | 156.1 |
| 115   | 1209 | D   | 1279 | 114   |
| 98    | 1307 | P   | 1165 | 98    |
| 57    | 1364 | G   | 1067 | 58    |
| 99    | 1462 | V   | 1009 | 99    |
| 167   | 1630 | S   | 910  | 167   |
| 147   | 1777 | F   | 743  | 147   |
| 128.1 | 1905 | K   | 596  | 128.1 |
| 71    | 1976 | A   | 468  | 71    |
| 99    | 2075 | V   | 397  | 98    |
| 57    | 2132 | G   | 299  | 58    |
| 113   | 2245 | L   | 241  | 113.1 |
| 128   | 2373 | Q   | 128  | 128.1 |

**B.**

|             |     |          |                |           |               |                 |
|-------------|-----|----------|----------------|-----------|---------------|-----------------|
|             | 208 | LQNKLVIS | EGKAEDKDVKGRAL | TAKSKSP   | -----         | 277             |
| M. musculus |     | LQNKLVIS | EGKAEDKDVKGRAL | TAKSKSP   | -----         |                 |
| R. rattus   |     | LQNKLVIS | EGKADKDVKGPAL  | PKSP      | -----         |                 |
| H. sapein   |     | LQGKLLF  | PEAEAEENLPDDK  | PQPTRPQEQ | STGDTMGRDPGVS | FKAVGLQPAGDVNLP |
|             |     | **.*.*   | ::.*.*         | :::       | :             |                 |

### C. Zwint OL

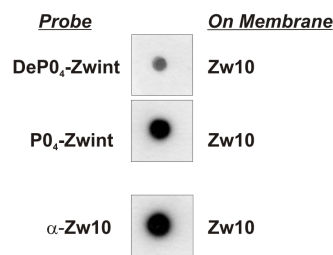

### D. ZW10 OL

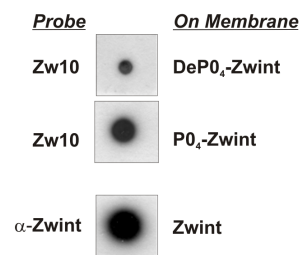

**Supplemental Figure 3: Phosphorylation Analysis of Zwint-1.** **A)** Fragmentation data of C-terminal EndoGlu-C fragment of phosphorylated Zwint-1. The peptide sequence is presented with Y and B fragment data. Species containing S250, T251 and S262 are each shifted by 80 Da for each phosphate. **B)** Sequence alignment of C-terminal sequences from mouse, rat and human zwint-1. Phosphorylation sites in human zwint-1 are indicated in red, whereas potential sites in rodent sequences are indicated in yellow. **C)** Recombinant ZW10 spotted onto PVDF membranes was probed with recombinant zwint-1 or phosphorylated zwint-1. **D)** Recombinant zwint-1 or phosphorylated zwint-1 was spotted onto PVDF membranes and probed with recombinant ZW10.

## Supplemental Figure 4

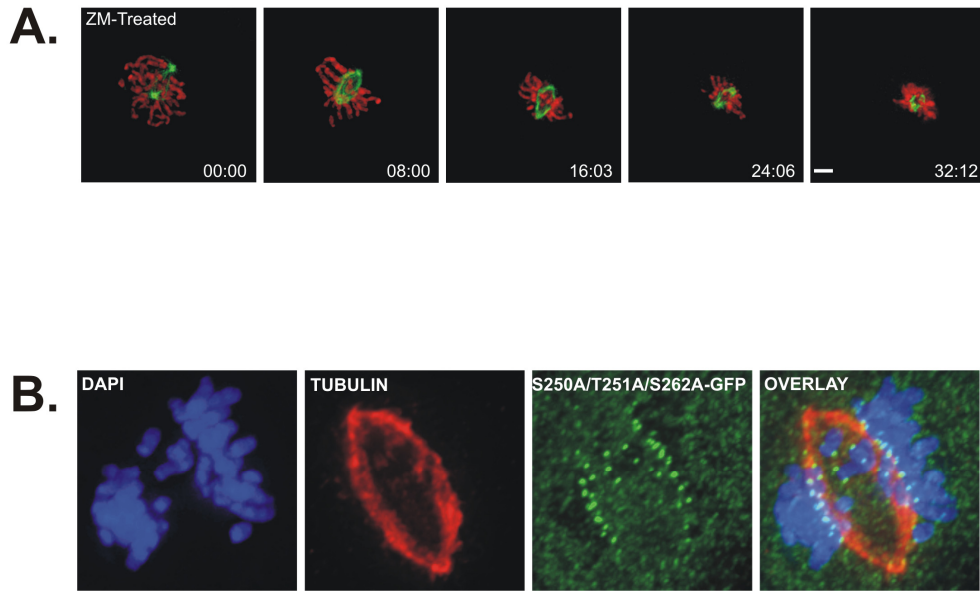

**Supplemental Figure 4: Microtubule Attachment in Cells Expressing Triple-A Mutant Zwint-1.** **A)** Timelapse imaging of NRK2 cells expressing mCherry-H2B and EGFP-tubulin after ZM-treatment. Cells treated with ZM display prometaphase arrest and eventual spindle collapse over the time-lapse sequence. **B)** IFM analysis of cells expressing triple-A mutant zwint-1 demonstrate association of kinetochores with the mitotic spindle.

Supplemental Figure 5A&B.

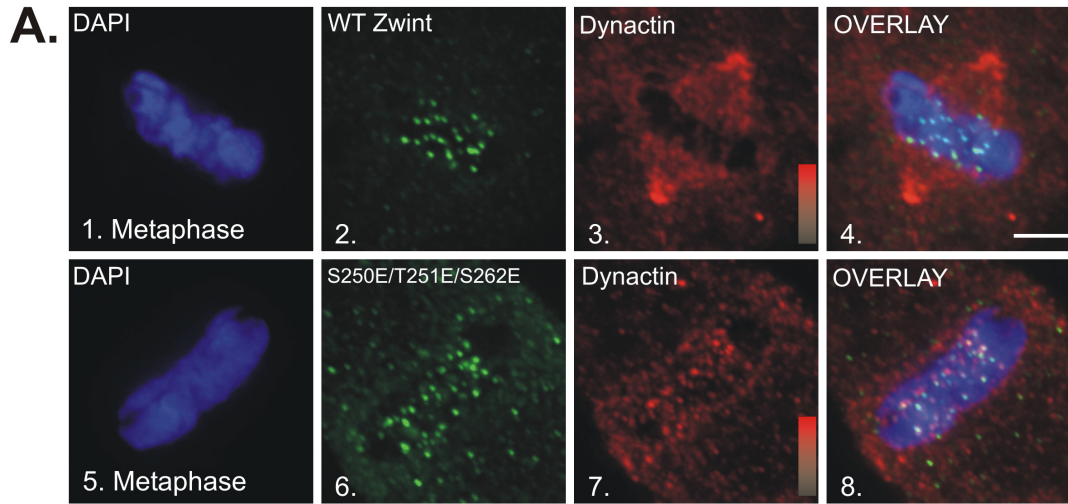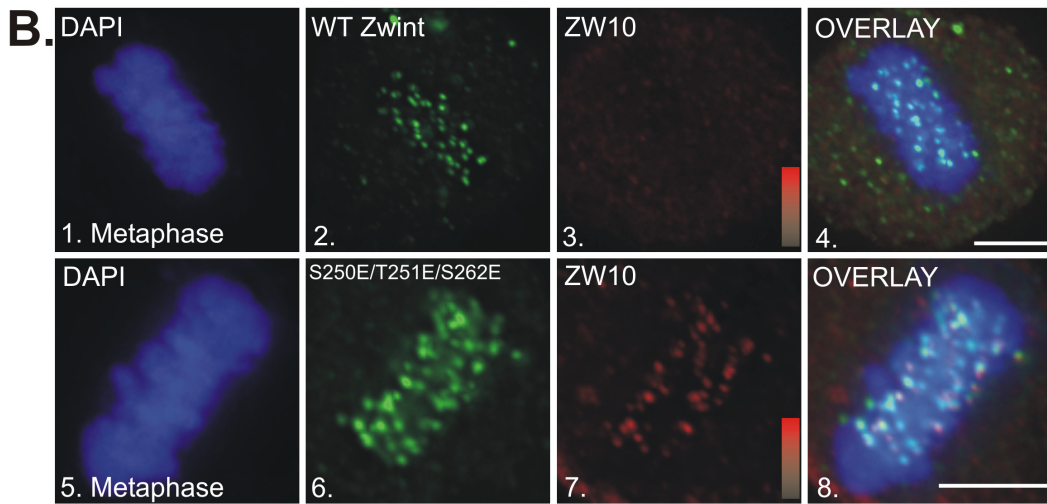



**Supplemental Figure 5C&D.**

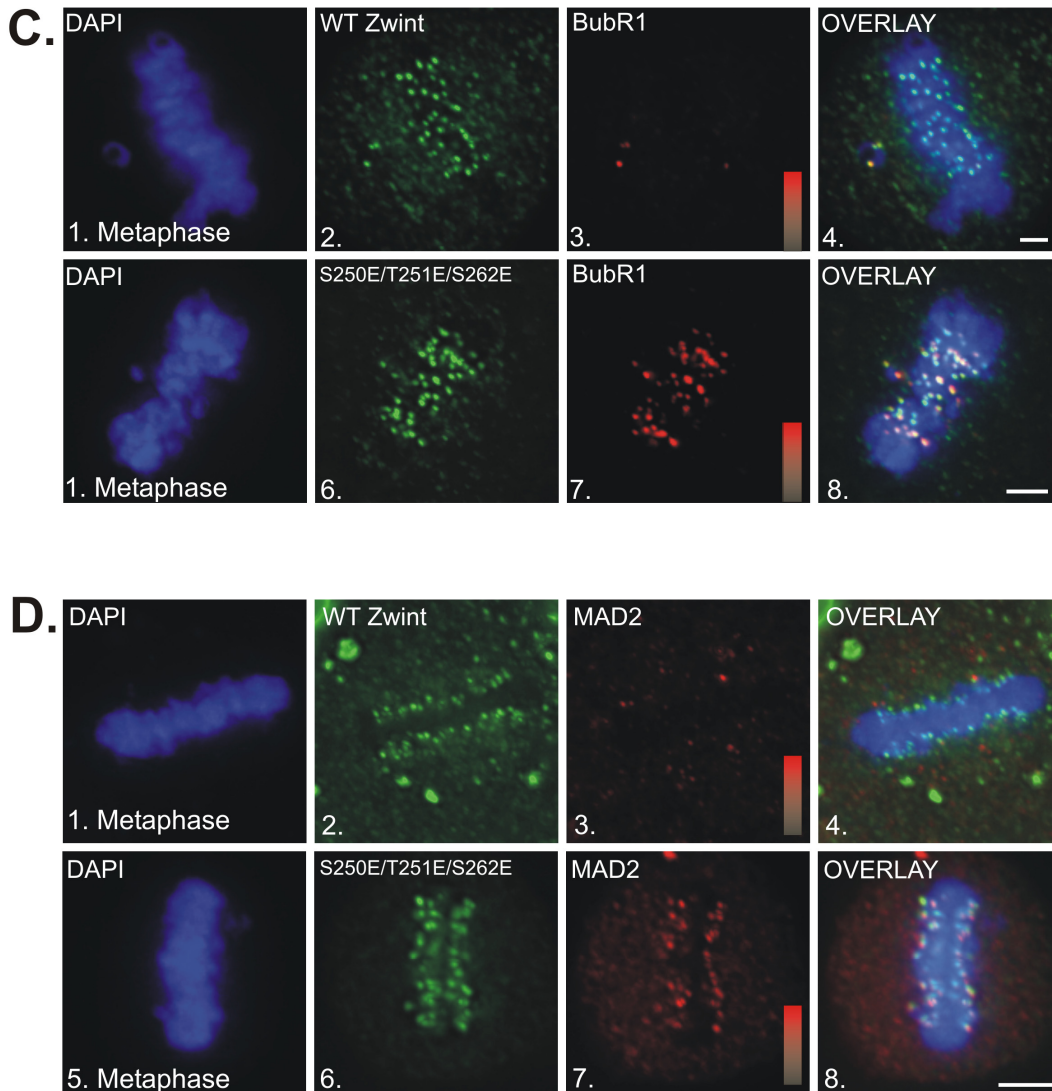

**Supplemental Figure 5: Impact of Triple-E Mutant Expression on Dynein-driven Streaming at Metaphase. A)** NRK2 cells (at metaphase) stained for chromatin (DAPI, blue) and dynactin (red) after expression of w.t. zwint-1-EGFP (panels 1-4) or triple-E mutant zwint-1-EGFP (panels 5-8). Intensity gradients correspond to intensity values of 0-10,000. Mag. bar = 5 $\mu$ m. **B)** NRK2 cells (at metaphase) stained for chromatin (DAPI, blue) and ZW10 (red) after expression of w.t. zwint-1-EGFP (panels 1-4) or triple-E mutant zwint-1-EGFP (panels 5-8). Intensity gradients correspond to intensity values of 0-10,000. Mag. bar = 5 $\mu$ m. **C)** NRK2 cells (at metaphase) stained for chromatin (DAPI, blue) and BubR1 (red) after expression of w.t. zwint-1-EGFP (panels 1-4) or triple-E mutant zwint-1-EGFP (panels 5-8). Intensity gradients correspond to intensity values of 0-11,000. Mag. bar = 5 $\mu$ m. **D)** NRK2 cells (at metaphase) stained for chromatin (DAPI, blue) and MAD2 (red) after expression of w.t. zwint-1-EGFP (panels 1-4) or triple-E mutant zwint-1-EGFP (panels 5-8). Intensity gradients correspond to intensity values of 0-13,000. Mag. bar = 5 $\mu$ m.
